# Supplementary material for: Solid Features Modification by the Reactor Selection and US Support during Reactive Crystallization
Source: MDPI journal article supplement (doi:10.3390/ma15217419), 2022-10-22
Supplement: s1 [file s1]

## SUPPLEMENTARY FILES

*Table S1. Properties of the reactants*

| Property         | Symbol with unit            | NH <sub>4</sub> F    | Ca(NO <sub>3</sub> ) <sub>2</sub> | Liquid-solid suspension | Mother liquor        |
|------------------|-----------------------------|----------------------|-----------------------------------|-------------------------|----------------------|
| <i>Density</i>   | $\rho$ [kg/m <sup>3</sup> ] | 1003.14              | 1013.37                           | 1009.35                 | 1002.84              |
| <i>Viscosity</i> | $\eta$ [Pa·s]               | $1.01 \cdot 10^{-3}$ | $0.93 \cdot 10^{-3}$              | nd <sup>1</sup>         | $0.90 \cdot 10^{-3}$ |

*Table S2. Dimensions of the used reactors*

|                                            | Symbol with unit                                             | Tank reactor                                                      | Koflo static mixer                                  |
|--------------------------------------------|--------------------------------------------------------------|-------------------------------------------------------------------|-----------------------------------------------------|
| <i>Type of mixing operation</i>            | -                                                            | <i>mechanical</i>                                                 | <i>static</i>                                       |
| <i>Shape of mixing elements/mixer type</i> | -                                                            | <i>turbine agitator</i>                                           | <i>semi-circular inserts</i>                        |
| <i>Number of mixing elements</i>           | <i>N</i>                                                     | -                                                                 | <i>6</i>                                            |
| <i>Inner diameter of a reactor</i>         | <i>D [m]</i>                                                 | <i>0.07</i>                                                       | <i>0.015</i>                                        |
| <i>Diameter of mixing element</i>          | <i>d<sub>m</sub> [m]</i>                                     | <i>0.04</i>                                                       | <i>0.015</i>                                        |
| <i>Height of mixing element</i>            | <i>h<sub>m</sub> [m]</i>                                     | <i>0.012</i>                                                      | -                                                   |
| <i>Length</i>                              | <i>L [m]</i>                                                 | -                                                                 | <i>0.186</i>                                        |
| <i>Height</i>                              | <i>H [m]</i>                                                 | <i>0.07</i>                                                       | -                                                   |
| <i>Total volume*</i>                       | <i>V [mL]</i><br><i>[ml = 10<sup>-6</sup> m<sup>3</sup>]</i> | <i>250</i>                                                        | <i>16.4</i><br><br><i>*excluding mixing inserts</i> |
| <i>Additional equipment</i>                | -                                                            | <i>4 baffles</i><br><i>height: 0.05 m</i><br><i>width: 0.07 m</i> | -                                                   |

---

<sup>1</sup> nd – not determined

Table S3. Operating conditions of the precipitation process  
carried out in the Koflo STM for the constant value of  $\varepsilon_{mix} = 0.1$  W/kg

| $V$<br>[l/h] | $t_m$<br>[s] | $f$<br>[kHz]  | $\varepsilon_{mix}$<br>[W/kg] | $Re_{eqv}$<br>(silent<br>conditions) | $P_{US}$<br>[W] | $\varepsilon_{US}$<br>[W/kg] | $\varepsilon = \varepsilon_{mix} + \varepsilon_{US}$<br>[W/kg] | $Re_{eqv}$ |
|--------------|--------------|---------------|-------------------------------|--------------------------------------|-----------------|------------------------------|----------------------------------------------------------------|------------|
| 40           | 1.61         | 40<br>i<br>59 | 0.1                           | 1 091                                | 150             | 14.9                         | 15.0                                                           | 5 790      |
|              |              |               |                               |                                      | 225             | 22.3                         | 22.4                                                           | 6 623      |
|              |              |               |                               |                                      | 300             | 29.7                         | 29.8                                                           | 7 287      |

Table S4. Operating conditions of the precipitation process  
carried out in the Koflo STM for the constant value of  $\varepsilon_{US} = 14.9$  W/kg

| $V$<br>[l/h] | $t_m$<br>[s] | $f$<br>[kHz]    | $\varepsilon_{mix}$<br>[W/kg] | $Re_{eqv}$<br>(silent<br>conditions) | $P_{US}$<br>[W] | $\varepsilon_{US}$<br>[W/kg] | $\varepsilon = \varepsilon_{mix} + \varepsilon_{US}$<br>[W/kg] | $Re_{eqv}$ |
|--------------|--------------|-----------------|-------------------------------|--------------------------------------|-----------------|------------------------------|----------------------------------------------------------------|------------|
| 30           | 2.16         | 40<br>and<br>59 | 0.04                          | 804                                  | 150             | 14.9                         | 14.94                                                          | 5 782      |
| 40           | 1.61         |                 | 0.10                          | 1 091                                |                 |                              | 15.0                                                           | 5 790      |
| 100          | 0.65         |                 | 1.5                           | 2 672                                |                 |                              | 16.4                                                           | 5 961      |
| 150          | 0.43         |                 | 4.9                           | 3 994                                |                 |                              | 19.8                                                           | 6 354      |

Table S5. Operating conditions of the precipitation process  
carried out in the STR for the constant value of  $\varepsilon_{mix} = 0.4$  W/kg

| $\tau$<br>[s]  | $f$<br>[kHz]    | $\omega$<br>[rpm] | $\varepsilon_{mix}$<br>[W/kg] | $Re_{eqv}$<br>(silent<br>conditions) | $P_{US}$<br>[W] | $\varepsilon_{US}$<br>[W/kg] | $\varepsilon = \varepsilon_{mix} + \varepsilon_{US}$<br>[W/kg] | $Re_{eqv}$<br>(US + mix) |
|----------------|-----------------|-------------------|-------------------------------|--------------------------------------|-----------------|------------------------------|----------------------------------------------------------------|--------------------------|
| 30<br>and<br>9 | 40<br>and<br>59 | 250               | 0.4                           | 3 022                                | 150             | 14.9                         | 15.3                                                           | 10 175                   |
|                |                 |                   |                               |                                      | 225             | 22.3                         | 22.7                                                           | 11 613                   |
|                |                 |                   |                               |                                      | 300             | 29.7                         | 30.1                                                           | 12 763                   |

Table S6. Operating conditions of the precipitation process  
carried out in the STR for the constant value of  $\varepsilon_{US} = 14.9 \text{ W/kg}$

| $\tau$<br>[s]  | $f$<br>[kHz]    | $\omega$<br>[rpm] | $\varepsilon_{mix}$<br>[W/kg] | $Re_{eqv}$<br>(silent<br>conditions) | $P_{US}$<br>[W] | $\varepsilon_{US}$<br>[W/kg] | $\varepsilon = \varepsilon_{mix} + \varepsilon_{US}$<br>[W/kg] | $Re_{eqv}$<br>(US + mix) |
|----------------|-----------------|-------------------|-------------------------------|--------------------------------------|-----------------|------------------------------|----------------------------------------------------------------|--------------------------|
| 30<br>and<br>9 | 40<br>and<br>59 | 250               | 0.4                           | 3 022                                | 150             | 14.9                         | 15.3                                                           | 10 175                   |
|                |                 | 350               | 1                             | 4 102                                |                 |                              | 15.9                                                           | 10 306                   |
|                |                 | 500               | 3                             | 5 916                                |                 |                              | 17.9                                                           | 10 722                   |

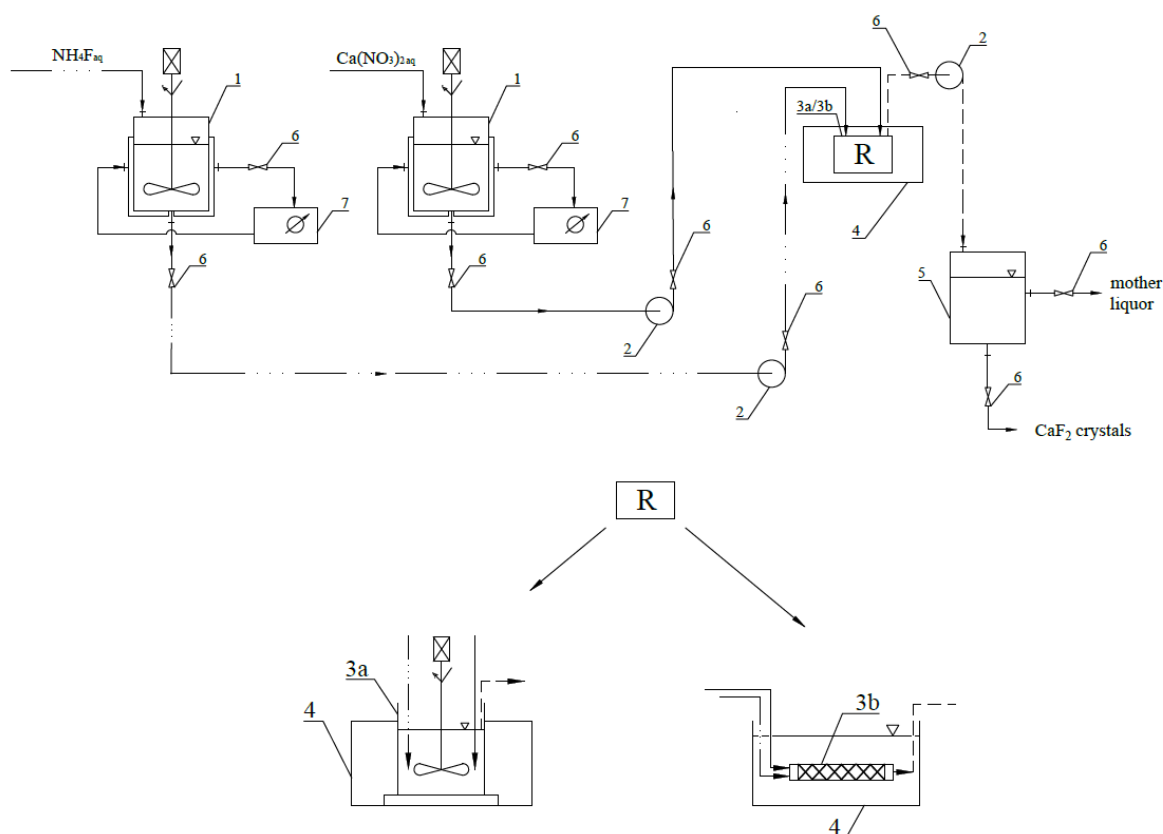

Figure S1. The experimental setup  
1 – substrate tank with a mechanical stirrer, 2 – pump, 3a – STR with a turbine stirrer, 3b – static mixer,  
4 – US bath, 5 – storage tank, 6 – valve, 7 – thermostat, R – reactor (3a, b)

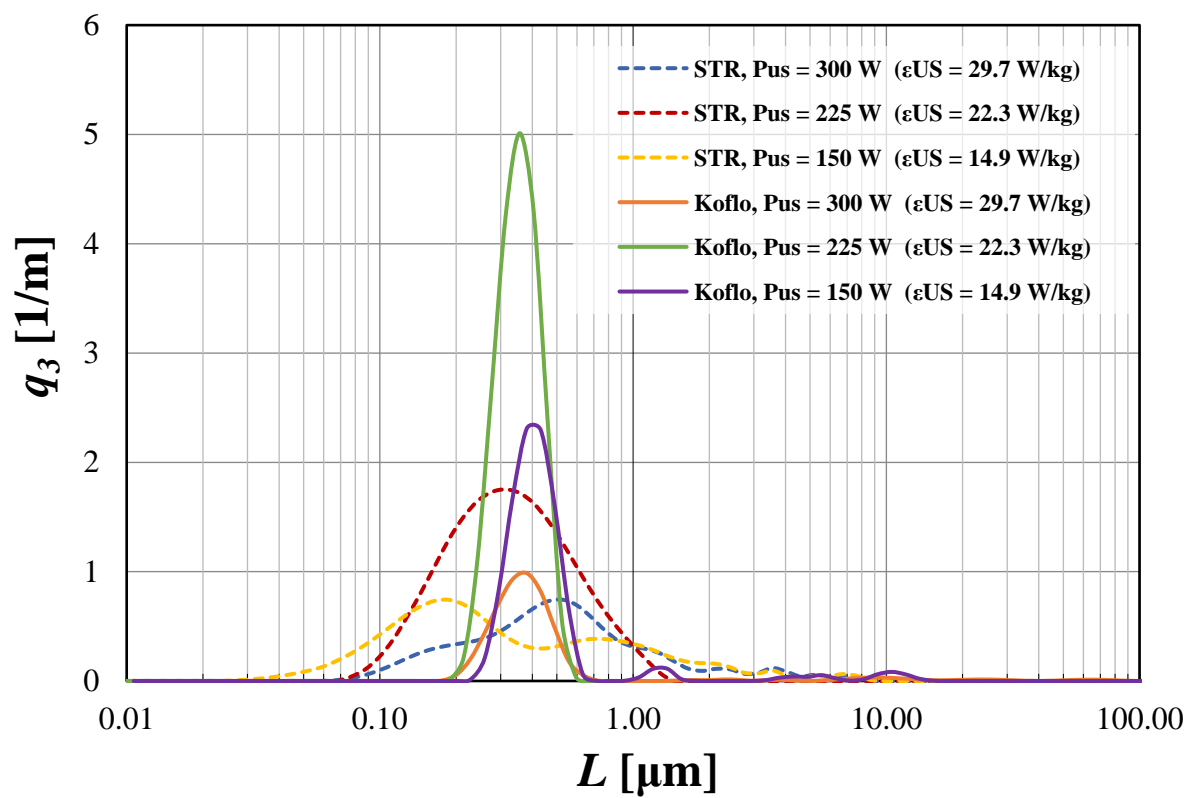

Figure S2. The influence of US power on particle density distribution  $q_3$  for both examined reactor types
